# Supplementary material for: COVID-19 Cases and Deaths among Healthcare Personnel with the Progression of the Pandemic in Korea from March 2020 to February 2022
Source: MDPI journal article supplement (doi:10.3390/tropicalmed8060308), 2023-06-05
Supplement: s1 [file s1]

**Table S1.** Characteristics of COVID-19 cases among healthcare professionals in Korea from 21 March 2020 to 4 February 2022.

| Variables                | Doctors <sup>1</sup> |      | Nurses <sup>2</sup> |      | Others <sup>3</sup> |      | <i>p</i> -Value |
|--------------------------|----------------------|------|---------------------|------|---------------------|------|-----------------|
|                          | N                    | %    | N                   | %    | N                   | %    |                 |
| Sex                      |                      |      |                     |      |                     |      | <0.01           |
| Male                     | 1238                 | 73.0 | 415                 | 7.0  | 739                 | 24.0 |                 |
| Female                   | 457                  | 27.0 | 5483                | 93.0 | 2338                | 76.0 |                 |
| Age                      |                      |      |                     |      |                     |      | <0.01           |
| <20                      | 0                    | 0.0  | 22                  | 0.4  | 0                   | 0.0  |                 |
| 20–29                    | 164                  | 9.7  | 1841                | 31.2 | 809                 | 26.3 |                 |
| 30–39                    | 523                  | 30.9 | 1377                | 23.3 | 563                 | 18.3 |                 |
| 40–49                    | 458                  | 27.0 | 1426                | 24.2 | 357                 | 11.6 |                 |
| 50–59                    | 324                  | 19.1 | 989                 | 16.8 | 546                 | 17.7 |                 |
| 60–69                    | 162                  | 9.6  | 225                 | 3.8  | 723                 | 23.5 |                 |
| 70+                      | 64                   | 3.8  | 18                  | 0.3  | 79                  | 2.6  |                 |
| Vaccination at diagnosis |                      |      |                     |      |                     |      | <0.01           |
| Partially vaccinated     | 130                  | 7.7  | 337                 | 5.7  | 166                 | 5.4  |                 |
| Fully vaccinated         | 994                  | 58.6 | 3658                | 62.0 | 1928                | 62.7 |                 |
| Booster vaccinated       | 429                  | 25.3 | 1670                | 28.3 | 805                 | 26.2 |                 |
| Not vaccinated           | 142                  | 8.4  | 233                 | 4.0  | 178                 | 5.8  |                 |

<sup>1</sup> Medical doctors, dentists, and oriental doctors. <sup>2</sup> Registered nurses and nurse assistants. <sup>3</sup> Physical therapists, radiologic technicians, emergency medical technicians, medical laboratory technologists, occupational therapists, psychologists, dental assistants, pharmacists, care workers, licensed herbalists, paramedics, and firefighters.

**Table S2.** Summary of the key characteristics of the COVID-19 epidemic in Korea by periods of major variants from March 21, 2020 to February 4, 2022.

| Variables                                                               | Period by major variant of SARS-CoV-2                                                                                                                                                                                                                                                     |                                                                                                                                           |                                                                                                                                                                                                                                                                                                                          |                                                                                                                                                                                                                                                                    |
|-------------------------------------------------------------------------|-------------------------------------------------------------------------------------------------------------------------------------------------------------------------------------------------------------------------------------------------------------------------------------------|-------------------------------------------------------------------------------------------------------------------------------------------|--------------------------------------------------------------------------------------------------------------------------------------------------------------------------------------------------------------------------------------------------------------------------------------------------------------------------|--------------------------------------------------------------------------------------------------------------------------------------------------------------------------------------------------------------------------------------------------------------------|
|                                                                         | 20.3.21~<br>20.12.12                                                                                                                                                                                                                                                                      | 20.12.13~<br>21.4.7                                                                                                                       | 21.4.8~<br>21.11.24                                                                                                                                                                                                                                                                                                      | 21.11.25~<br>22.2.4                                                                                                                                                                                                                                                |
|                                                                         | (GH clade)                                                                                                                                                                                                                                                                                | (Alpha)                                                                                                                                   | (Delta)                                                                                                                                                                                                                                                                                                                  | (Omicron)                                                                                                                                                                                                                                                          |
|                                                                         |                                                                                                                                                                                                                                                                                           |                                                                                                                                           |                                                                                                                                                                                                                                                                                                                          |                                                                                                                                                                                                                                                                    |
| Main policies                                                           |                                                                                                                                                                                                                                                                                           |                                                                                                                                           |                                                                                                                                                                                                                                                                                                                          |                                                                                                                                                                                                                                                                    |
| Major immigration and quarantine policy of Incheon airport <sup>1</sup> | <p>Quarantine of 14 days required upon arrival from April 1.</p> <p>Monitoring of foreign countries in three groups established: high risk, moderate, and safe.</p> <p>Designation of four high-risk countries effective from Jul 13. This was expanded to six countries from Jul 20.</p> | <p>The category ‘closely monitoring countries’ was added to the monitoring system of the pandemic in foreign countries from Oct 2020.</p> | <p>Fully vaccinated exempted from quarantine from May 5 (limited to those vaccinated in Korea), and from Jul 1 (expanded to those vaccinated outside Korea).</p> <p>Quarantine of 14 days reduced to 10 days from Nov 1.</p> <p>Foreign country monitoring categories modified from four to three groups from Nov 1.</p> | <p>Passengers arriving from 8 countries in Africa reporting Omicron not allowed to enter from Nov 28, expanded to 11 countries on Dec 17. This was lifted on Feb 4, 2022.</p> <p>Quarantine days reduced to 7 days from Feb 4 and later lifted on Jun 8, 2022.</p> |
| Social distancing policy in general <sup>2</sup>                        | <p>Mobility restraints in Daegu city — where an outbreak occurred — for two weeks from Feb 22.</p> <p>Schools closed from March, with remote working and prohibition of gatherings in effect from March 22 until May 5. Later, NPI was downgraded but public places were closed.</p>      | <p>Loosened to level 2.0 in Feb (level 1.5 in most municipalities outside metropolitan areas).</p>                                        | <p>Strengthened to the highest level in mid-Jul, which included the closure of public facilities and prohibition of mass gatherings.</p> <p>From Nov 1, most NPI started to be lifted, except for mask requirements and limiting the number of people in private meetings.</p>                                           | <p>From Dec 18, micro-modified to a more restrictive level.</p> <p>From Apr 25, every NPI was lifted, except the wearing of masks indoors.</p>                                                                                                                     |

<sup>1</sup> This table conveys a short description of the overall policy. The guidelines consisted of detailed information, including exception criteria in several rules, but these are not described in the table.

<sup>2</sup> A general guideline for continuing or adjusting the level of NPI was used in all cities/municipalities in Korea. Since December 2020, local governments have been able to modify the NPI level in their city/municipality.
